# Supplementary material
Source: publisher site journal article supplement (https://iopscience.iop.org/1748-9326/8/2/024024/media/erl460291suppdata.pdf)
Supplement: Supplementary file 1 [file erl460291suppdata.pdf]

ShieldSquare Error


# Something went wrong

An error has prevented the portal from working properly.

Please contact us.

You reached this page when trying to access
**MDI3MDQ5ZTAzYjcxLTcyNDgtZjNlNC03NDRiLWRhYzdkOTUy** from
**18.224.0.25** on
**April 25 2024, 02:32:54 UTC**
